# Supplementary material
Source: MDPI journal article supplement (https://www.mdpi.com/2077-0472/12/4/472)
Supplement: s1 [file s1]

## **Language Editing Certification**

To whom it may concern:

The manuscript, entitled “Genetic Effects of *Indica* Lineage Introgression on Amylopectin Chain Length Distribution in *Japonica* Milled Rice”, has been professionally edited for English usage, grammar, spelling, and punctuation by Dr. John Hugh Snyder, a native English speaker and a skilled professional editor with a Ph.D. in biochemistry from Cornell University. Therefore, we would appreciate if any comments regarding language are as specific as possible.



Genesis Technology Communication (Beijing), Co, Ltd.

2022.3.5
