# Supplementary material
Source: MDPI journal article supplement (https://www.mdpi.com/2077-0472/12/4/472)
Supplement: s1 [file s1]

Archive with 2 entries (2 files):
- Editting Certificate.pdf
- Supplementary Table.xlsx
