# Supplementary material
Source: MDPI journal article supplement (https://www.mdpi.com/2077-0472/12/4/472)
Supplement: s1 [file s1 › Supplementary Table.xlsx]

## Sheet: Supplementary Table S1
Supplementary Table S1 Introgression interval and marker information of the CSSLs
	Introgression interval of TN013 fragment	Primer of Indel marker in upstream of the introgression frgment	Primer of Indel marker in downstream of the introgression frgment
ST1	chr01:1244507 - chr01:1842028	F:GTACTTGTTGTAGCGCCCGTTCC R:GGAGAACGAGAAAGAGGGAGAGC	F:CGGAGAATAAGGATCCCAGAGC R:AGGCCTGTTCATGTCTTTGATGC
ST2	chr01:2606507-chr01:10472302	F:TGACAGGTCACCTTCTCACAGC R:AGACTGGACACAGCAACTCTCC	F:GATCTCAACACACATGCAAACTGG R: CTAGCGTATGCAAGGAAGGATGC
ST3	chr01:11026077-chr01:21756106	F:GAGACACGGCACAATATACAACG R:TTCTATCTCCGACCTCTTCTCAAGG	F:TTACGCTAATGCTTGCTGCTTGC R:ATGGAGAAACTGGACGGAGAGG
ST4	chr01:21994594-chr01:35316394	F:ATCGGAGAAATCACAGGAAACG R:AGCAAAGACAGAGGGCCATAGG	F:GGGTGTACCGGAGCATGAAGTCC R:AAGAAACGCGCACCAAACTCTCG
ST5	chr01:32331665-chr01:42844891	F:CAGGACATGAAGTTCTCATGAACG R:CTAACTAGCCGCCTCTTGTCAGC	F:CCTCCCGTAAATAGTCCATACAGC R:CTTCACGCATCCACTGATTATTCC
ST6	chr02:168531-chr02:8980638	F:AGCATTGGCTCATAGAGATCGTTCG R: GACAGGGAGTACGGCAGGATGG	F:TATTGGTATGTGTGGGATCG R: CTGGTGTACCTATATGGATTGC
ST7	chr02:8980638-chr02:19575622	F:TATTGGTATGTGTGGGATCG R:CTGGTGTACCTATATGGATTGC	F:CAACGATGCCCTTTGAGTTTACC R:GCCTTGGTTAGCATACATCAGACG
ST8	chr02:19306939-chr02:29929546	F:CACTCGCGGTTCAAATGCTTACC R:TGAACGGCTCCAACGTGAAAGG	F:CAACGATACAGTAGCAGCACAAGC R: CACGAGTAGCTTTCAGTTCAGTTGC
ST9	chr02:29331976-chr02:35193554	F:AATGCCTAGCACTCATCCTTGC R:AGGCACCCTACGATGAAATAGTGG	F:ATGGCGTACACATGGCCTCACC R:GCGAAGACCCAAGAGGAAGAAGG
ST10	chr03:502571-chr03:12016993	F:CTCCGGGTTTCAGGTTCCATCC R:CACTCATCCGAACCAACCTTCG	F:TGCGCTACTTAAGGCTGTAGG R:GAGCAACAAGTTCTCCTTCTCC
ST11	chr03:9789579-chr03:20785166	F:GAACAGTGCCATAGGCACAAGG R:CAAACCACCATGAATCACAGTTGC	F:GTACAGTATTCCCACGCACTGG R:TCAGTCTGCCAAATTGATCAGC
ST12	chr03:17318506-chr03:30301498	F:GGAATCTCTCTCACCCAGTCACC R:CTTCCGCGCGATCTAATCTCC	F:GGCGAACGTTTACTTTAGCTGTTGG R:GGTACCACCGTCGCTGTTTGG
ST13	chr03:26547397-chr03:35746017	F:CCCTGTTTCCACTCACATGATGC R:CTCTGTGTGTTCTACCTGAGGTGTGG	F:CCCAAATGTAGTATGCGCCCTAGC R:AGCGCGACGATCTCATCAACG
ST14	chr04:219842-chr04:5154430	F:TGCAATCGCGTAGTTGGTAGAATAGG R: CTCGACTACCTCGCCATCATCC	F:AGAGGAGCGATGGGAGAGAGG R:CTTGCGGACAACCTACATCTTCG
ST15	chr04:6262563-chr04:20041204	F:AACCAGCTAGCCCTTTGGAAGC R:AGAGATGGATCAGCGCTTCTTGG	F:CGACTTGCCAAAGGTCAACG R: GATTCTACGGGCCACAAGTCC
ST16	chr04:20131193-chr04:26272571	F:GCTCGTTTCTCTCGATCACTCG R: GCAAGGTTGGATCAGTCATTTCG	F:TCGTTGGTCCAAGCTCACACG R:GGCCGGCAAAGGTATCTGTCG
ST17	chr04:24222926-chr04:35360506	F:GCAAGCAGCAAGAGCGAAGAGG R:CTCAAGGCCGCCTCTCAAATCC	F:GCATGCACCGATATAAGTAAGC R: TAAGCGAGTGAAAGAAGGAAGG
ST18	chr05:71514-chr05:16418130	F:TGCCCATGTATGTGAGGTACTCC R:GCCTAATCCAGGACAAGCTACGG	F:GTTGGTAGTGTCTTTGTGCAAGC R:GCAACACCTCTTTCAATCTTCC
ST19	chr05:6932308-chr05:20011559	F:CAAACAACCACCATCATCTTACCC R:CTCTCTCGTTAAGCCGACCATCC	F:CTCATCAGCTGCATTATCGTCTTGG R:CTGTCGCAGTCGCTCATCACG
ST20	chr05:19912953-chr05:29270305	F:TCAAGCTGCATTAGGAAGACACC R:AACTTAGCTGAAACGCAACACG	F:AACGAGGCCACGCGTATAACC R:CTGTTCCTCAATTCTGCATTCTCG
ST21	chr06:220065-chr06:7422860	F:TGTTGGATTGGAATCGGAAAGC R:CTCTGCTGTGCTGTGCTGCTAGG	F:CTCGTCCGTCTTTCTGCCTTACC R:TGCTTCTCGCTTCGTGTAGAAGG
ST22	chr06:7244774-chr06:19591044	F:CTCGTCCGTCTTTCTGCCTTACC R:TGCTTCTCGCTTCGTGTAGAAGG	F:CATTCGCCTTCTTCAAAGTCACC R:GAGCGAGGAGAGCCTATTTGTGC
ST23	chr06:16012484-chr06:25612939	F:TCACATCGAATACGTCCTTGTCG R:CGATTTCAGGGTGTGACACATAGC	F:GGCTTCGGCTTCTGAACTAGC R:CGACTAAGCAGCAGTAACAATCTCG
ST24	chr06:24138891-chr06:28149934	F:ACAAGACGTTGCCAACCATCC R:CCAACGGTGGTGGTAGTGATAGC	F:AGTGCCTGTTTGTTTCCTCTTCG R:CATGGTCAGAGCAAGTTAGTGTGG
ST25	chr07:606717-chr07:15858108	F:CACCTACCCGACAATCTCTCTCC R: CTTCTTCTTCTTCCAGCGAAACC	F:AGAAGTGCAGGTTGGCTCTGC R:CACGAATCTCGGAGTGTCTAGGG
ST26	chr07:5762230-chr07:18340360	F:TCACCCTTCTTGTCAAGCAAACC R:GAGGATCAGGATAGAACATGAGATGC	F:CACCAGCTGTTGCTTCCATAAGTACC R: GTCGACGTCCACGATGACTACC
ST27	chr07:18576999-chr07:28940485	F:GGCATGAGTGAATAGCAGAGAGG R:CTGCAACCCTATGAACATTGAGC	F:GGGAAGCCATCAAGCACTCC R:ACTACGACGCTCCAACCACTACG
ST28	chr08:141410-chr08:3733832	F:ACGAGTACTGGACATACAGTTAGGG R:ATCTACTCCATCCACGTCACC	F:CATGCTCGAATCAGTGAGTAGTGG R:GCTTAGCTATGCAGGAGAGAGTGG
ST29	chr08:3886487-chr08:21242182	F:TGAACCTATCATTTGCTGCCTAGC R:CTCTCACCAAGCCATTCATGACC	F:GGCAATCCAATATGGAGAAGATGG R:TGACTTCCACCGGCTTAATTTCC
ST30	chr08:19064404-chr08:27301706	F:GCGAGAGAGGAGAAGAGACATGG R:AGACGAACACCACCATCACAACC	F:GCCGACTTGACGAAATTGTGC R:CCTATCCATGAGGCAACCATGC
ST31	chr08:26290659-chr08:28187828	F:GAAGAAAGCGAAAGACGTGTTGG R:GTGTGATGAACGAGGAGAAGAGG	F:CTCTCTCATCACATGAATACGG R:TCATCTCACCTTGATCTCTACG
ST32	chr09:99249-chr09:16440933	F:CTCCGATGCCTTCTTCCTCTTGC R:AAAGGGAGTAGCAAGCCGAGTGG	F:ACATCTCTCTCGCTCCCTTTCC R:GGCTTTAAAGGGTGGATTGAACC
ST33	chr09:16719904-chr09:22188374	F:GCTGACACTCTGGAACTGGAAGG R:GGCCACTGCTAATTGTCTCAGG	F:CAAGCAGGCAGTGTACTCACAAGG R:GCATGGCCCACTAAACACACC
ST34	chr10:95397-chr10:11221582	F:TTGGTGTTGTCCACCTCCACATACC R:CGTCGATACCAATGGCGACTACC	F:TGCTCCGGAGATGTAGACTATGTCG R: TTCGTGGGTGATGGATATCTGC
ST35	chr10:11302535-chr10:22451248	F:TGCAACGAGGCAGAAATATCAGG R:CGGTGAACTTATTCCTCTAGCTTTCC	F:CTCATAGGTGGGTTAGTTTCTTGG R:GCTGGTTTACAACTTGCTACTCTACC
ST36	chr11:376012-chr11:8024755	F:TGTGAATCTGACTTGCCAATCG R:AAGGCTGTTATGTGTCTTGCAACC	F:GAAAGAGGAGGAAGAGCTAGAGG R:CCATATGTACGGAGTGTGTTTACC
ST37	chr11:8891443-chr11:18985205	F:GGTTTGGATTAATGGCGAGAGAGACC R:TTTGTAGCAGCACAGGACAGGAGTGG	F:CATCCAAATGTTGCGGATTACC R:TTCAATAGCCCAGAGAACCAAGC
ST38	chr11:18077883-chr11:28105891	F:TACTGCACATGATCTGAATCCACTGC R:CCCGTAAGGCACATACTGAACTTGG	F:ACGACAAGAAGACCGACTACTCC R:ATGCGTTTGAACAGCTATCAGG
ST39	chr12:1074383-chr12:7280879	F:AAGAGGAGCGGCGCATATTGG R:GGGACACGAGATTTCGATTTCATTGG	F:TTTGGCCACTTCCAATCTGAGC R:CGCACTTCTCTTGCTAACACAACC
ST40	chr12:18225086-chr12:23856699	F:CGGCTTAGGGAGCGTCTGTAGG R:GCATGCTAGTATGGCCACCATATTCC	F:GTGTTGAGAGGCGAGGAAATGG R:TGCCTACTTGATGATCACTTGACG
ST41	chr12:22124084-chr12:26973648	F:TACGTGCTGATCGATGTCATGC R:GTACTAAGCGCTAGTTTCCGATGG	F:GATCCATCTTTAGTCCCGTTGG R:GTCGGTCCTTCCTATTCTGACG

## Sheet: Supplementary Table S2-S8 
			Supplementary Table S2 different sites information of GIF1 between two parents
			variety	nonsynonymous codon	synonymous codon	synonymous codon	synonymous codon	nonsynonymous codon	synonymous codon
				20422339	20423654	20423672	20423957	20425861	20425931
			TN013	G	G	A	C	T	T
			SN265	A	A	C	G	G	C
			Supplementary Table S3 different sites information of BEIIb between two parents
			variety	synonymous codon	synonymous codon	synonymous codon	nonsynonymous codon	nonsynonymous codon
				19360968	19361451	19363928	19365137	19366170
			TN013	A	T	T	C	C
			SN265	G	G	A	T	A
			Supplementary Table S4 different sites information of SSIIc between two parents
			variety	synonymous codon	nonsynonymous codon	synonymous codon	nonsynonymous codon	synonymous codon	nonsynonymous codon
				15674321	15675357	15675448	15675473	15680072	15680316
			TN013	C	A	A	T	T	A
			SN265	T	G	T	G	C	C
			Supplementary Table S5 different sites information of SSIIIa between two parents
			variety	nonsynonymous_codon	nonsynonymous_codon	synonymous codon	synonymous codon	nonsynonymous_codon	synonymous_variant	synonymous codon	synonymous codon
				5353719	5353938	5354380	5355239	5355663	5357619	5362865	5363145
			TN013	T	T	C	A	A	A	T	A
			SN265	C	C	T	C	T	G	C	T
			Supplementary Table S6 different sites information of ISA between two parents
			variety	nonsynonymous_codon	synonymous codon	synonymous codon	Frame shift
				25894130	25894417	25898062	25900365
			TN013	A	A	A	CCCT
			SN265	G	G	G	C
			Supplementary Table S7 different sites information of SSI between two parents
					variety	nonsynonymous_codon
						3082326
					TN013	C
					SN265	T
			Supplementary Table S8 different sites information of SSIIb between two parents
			variety	synonymous codon	nonsynonymous_codon	nonsynonymous_codon	nonsynonymous_codon	nonsynonymous_codon	synonymous codon	synonymous codon
				31234431	31237132	31237203	31237662	31237695	31237870	31237897
			TN013	A	G	G	T	C	A	A
			SN265	G	A	T	C	T	G	C

## Sheet: Supplementary Table S9 
					Supplementary Table S9 Gene information related to quality trait factors and RVA between two parents
					gene name	annotation	Position	CSSLs with introgression	Polymorphism between parents
					AGPiso	glucose-1-phosphate adenylyltransferase large subunit	chr01:25353805..25361883	ST4	yes
					ALK(SSⅡa、SSⅡ-3)	soluble starch synthase 2-3	chr06:6748398…6753302	ST21	no
					SBE3(BEⅡb)	1,4-alpha-glucan-branching enzyme	chr02:19355790..19367127	ST7、ST8	yes
					SSⅣ-2	starch synthase	chr05:26485770..26493983	ST20	yes
					ISA	Alpha amylase	chr08:25893657..25900576	ST30	yes
					PUL	Pullulanase-type starch debranching enzyme	chr04:4408357..4418889	ST14	no
					SBE1(BE1)	1,4-alpha-glucan-branching enzyme	chr06:30897378..30905803	NA	no
					Supplementary Table 11 different sites information of SSⅣ-2 between two parents
					variety	synonymous_variant	synonymous_variant	synonymous_variant	synonymous_variant
						26487913	26488982	26490715	26493216
					TN013	G	T	G	C
					SN265	A	C	A	T

## Sheet: Supplementary Table S10 
					Supplementary Table S10 different sites information of AGPiso between two parents
					variety	5_prime_UTR_premature_start_codon	5_prime_UTR_premature_start_codon	synonymous_variant
						25354183	25355048	25360548
					TN013	G	C	C
					SN265	A	T	T

## Sheet: Supplementary Table S11 
					Supplementary Table S11 different sites information of SSⅣ-2 between two parents
					variety	synonymous_variant	synonymous_variant	synonymous_variant	synonymous_variant
						26487913	26488982	26490715	26493216
					TN013	G	T	G	C
					SN265	A	C	A	T
